# Supplementary material for: Chloroplast Localized FIBRILLIN11 Is Involved in the Osmotic Stress Response during Arabidopsis Seed Germination
Source: MDPI journal article supplement (doi:10.3390/biology10050368), 2021-04-25
Supplement: s1 [file s1]

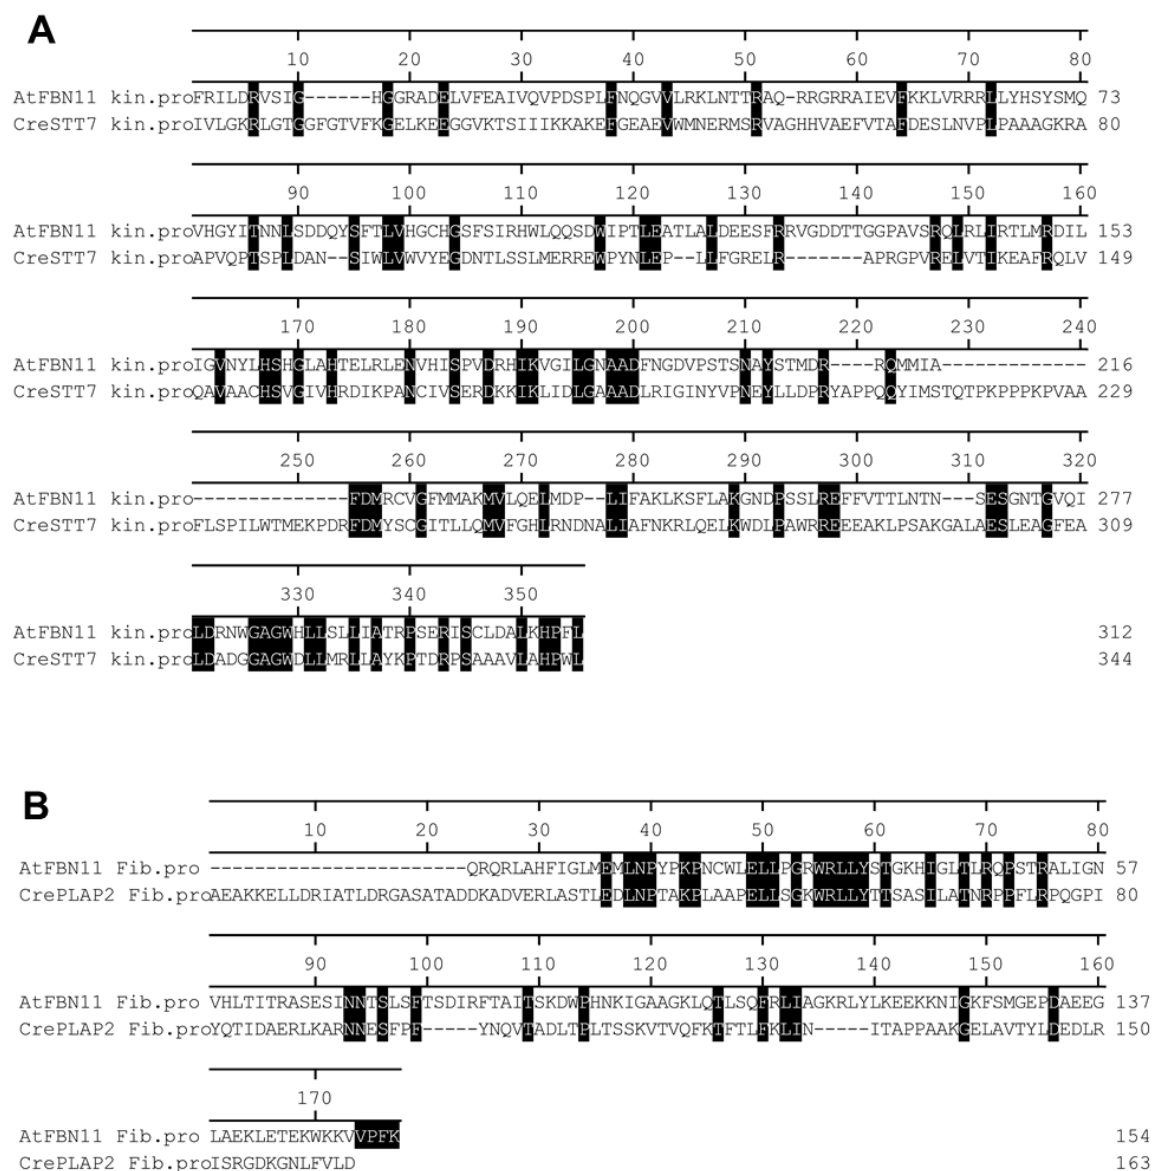

**Figure S2.** (A) Amino acid alignment between the kinase domain of Arabidopsis FBN11 and CreSTT7 of Chlamydomonas. (B) Amino acid alignment between FBN11 and the CrePLAP2 FBN domain of Chlamydomonas.

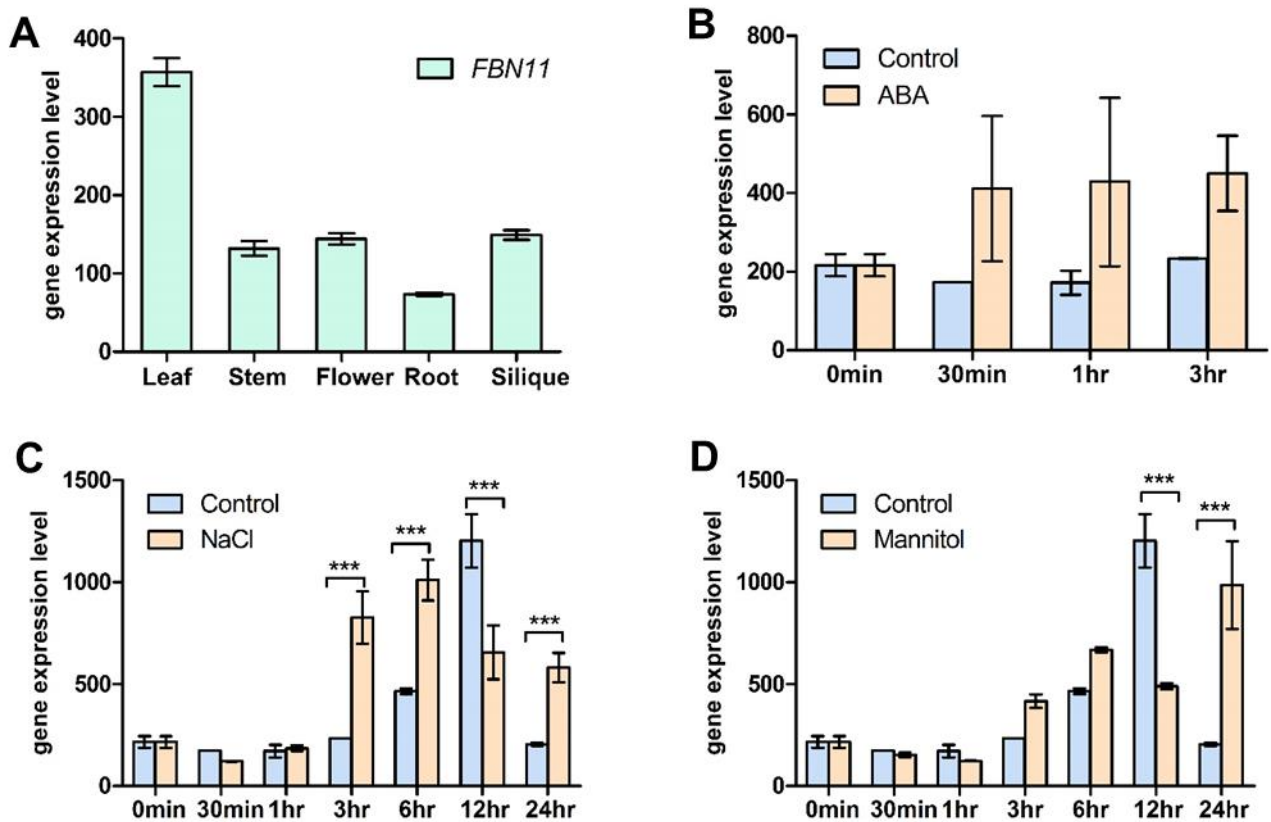

**Figure S3.** *FBN11* gene expression profiles in various tissues under various abiotic stresses. (A) *FBN11* gene expression levels in leaves, stems, flowers, roots, and silique of wild-type Arabidopsis. (B) Effect of 10  $\mu$ M ABA treatment on *FBN11* gene expression levels in 7-day-old Arabidopsis seedlings. (D) Effects of 150 mM NaCl (C) and 300 mM mannitol (D) on *FBN11* gene expression levels in 18-day-old Arabidopsis seedlings. Statistical analysis is done by two-way ANOVA with Bonferroni post-test (\*\*\*)  $P < 0.001$ .

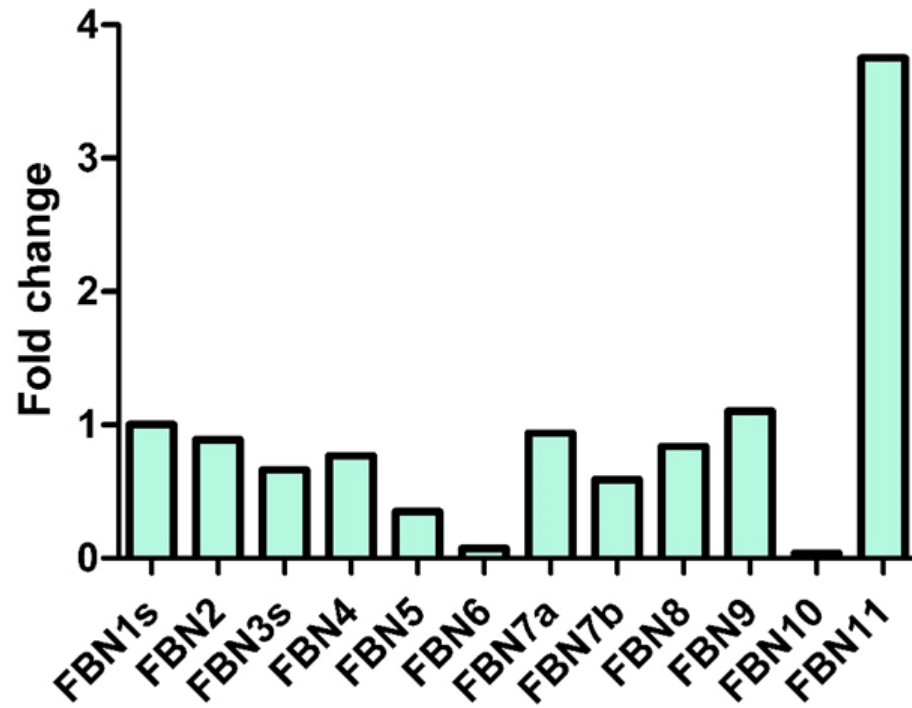

**Figure S4.** Expression profiles of *FBN* family genes in stage 10 seeds without siliques. This analysis was performed with data from the TAIR eFP browser ([http://bar.utoronto.ca/efp2/Arabidopsis/Arabidopsis\\_eFPBrowser2.html](http://bar.utoronto.ca/efp2/Arabidopsis/Arabidopsis_eFPBrowser2.html)). The expression value of each gene is a fold change based on *FBN1a*. *FBN1s* represents *FBN1a* and *1b*. *FBN3s* stands for *FBN3a* and *3b*. These duplicated genes are indistinguishable because of their high sequence homology.

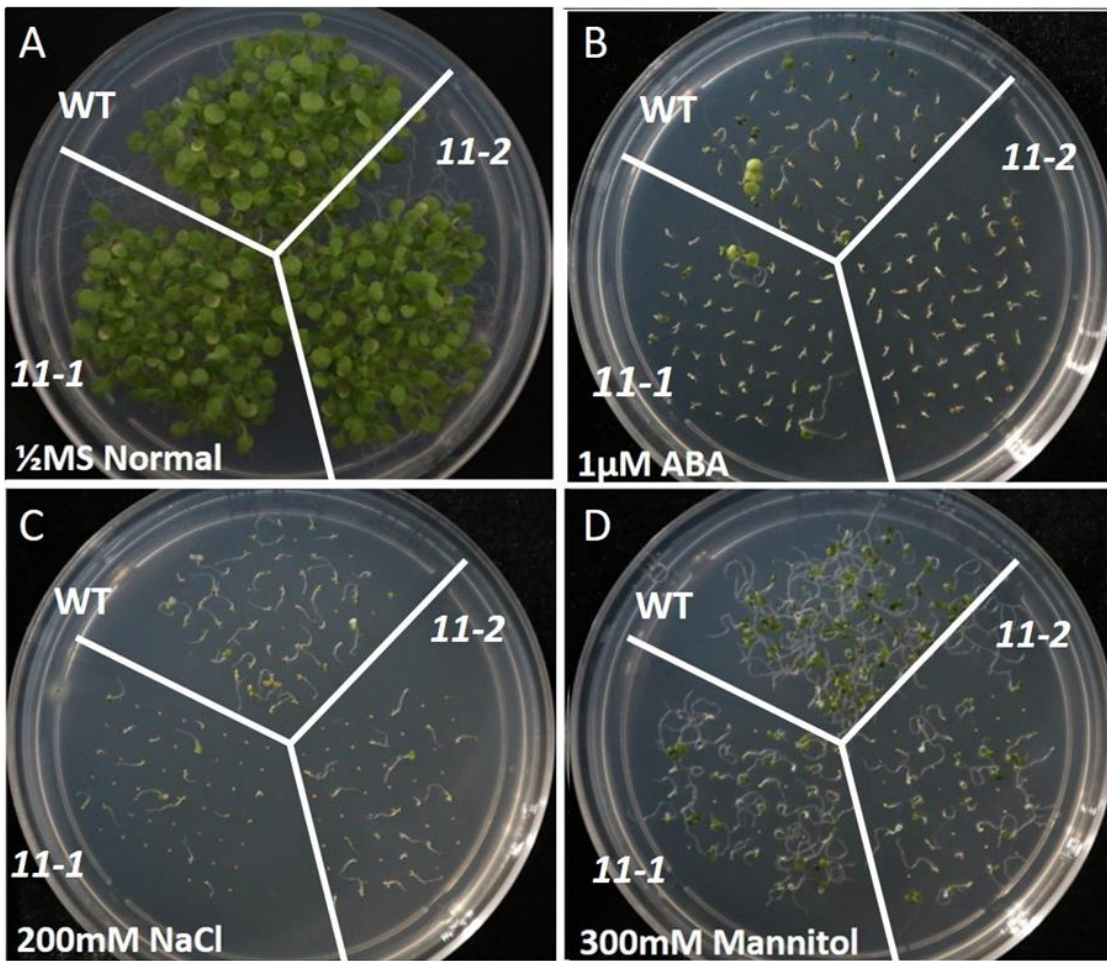

**Figure S5.** Seed germination phenotypes of wild type and *fbn11* homozygous mutants under stress. Unsupplemented growth media (A), or media supplemented with 1  $\mu$ M ABA (B), 200 mM NaCl (C), or 300 mM mannitol (D). Representative photographs of 7- day old plants.

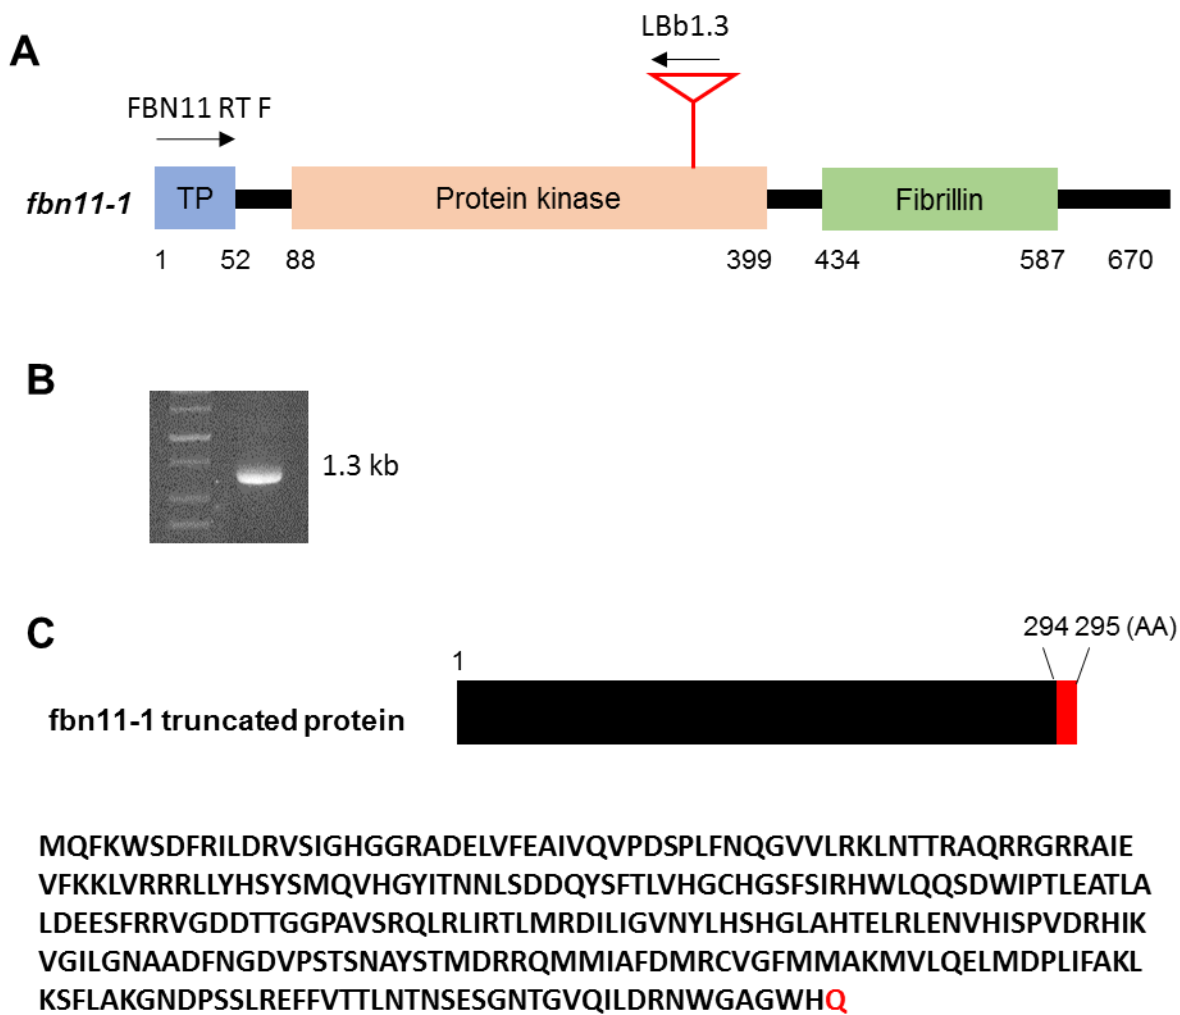

**Figure S6.** *fbn11-1* truncated transcript and deduced protein sequences. (A) The T-DNA insertion site of *fbn11-1* and primers position for truncated transcript detection (B) Transcript detected by RT-PCR from RNA of *fbn11-1* seedlings using FBN11 RT F and LBb1.3 primer (Table S1) (C) Protein sequence (295AA) encoded by *fbn11-1* truncated transcript. The black box represents the wild-type FBN11 amino acid sequences, and the red box represents the amino acid sequence generated by T-DNA fusion.

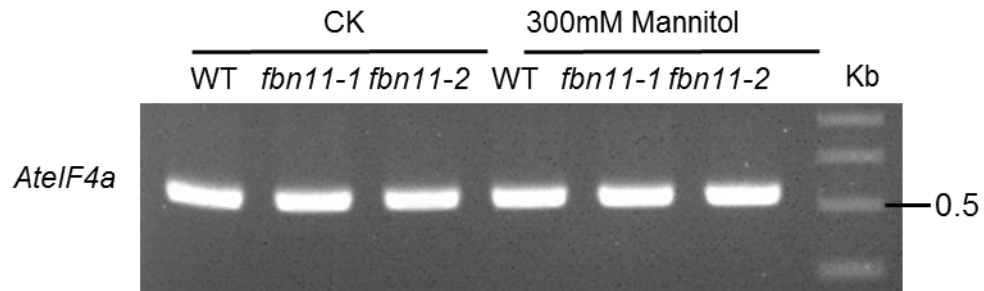

**Figure S7.** RT-PCR expression analysis of *AteIF4* during seed germination of wild type and *fbn11* mutants non-treated (CK) and treated with 300 mM mannitol. PCR with 30 cycle amplification was performed using primers (forward: 5'-CGTGGTTTCAAGGACCAGAT-3' and reverse: 5'-ATTGATCGCAACACCCTTCT-3') that detect 0.5 kb of *AteIF4* transcript.

**Table S1.** Primers used in this study.

| Primer name                                |            | Sequence                                  |
|--------------------------------------------|------------|-------------------------------------------|
| Relative expression for ABA pathway gene   |            |                                           |
| qRT-ABF2                                   | F          | 5'-ACATACCAGCAATCGCAACA-3'                |
|                                            | R          | 5'-CCACAAGACCACCACCTCTT-3'                |
| qRT-ABF4                                   | F          | 5'-TGGTCAGCCAAATCAAAACA-3'                |
|                                            | R          | 5'-GTTGTTGTTGCTGCTGCATT-3'                |
| qRT-ABF1                                   | F          | 5'-GCCTGGAGAAGGTTGTTGAG-3'                |
|                                            | R          | 5'-TCAGCTTCCAGTTCCAAGGT-3'                |
| qRT-ABF3                                   | F          | 5'-CTGGAAGGAGCTGATGAAGG-3'                |
|                                            | R          | 5'-AGCCCTGACCAAAACTCCT-3'                 |
| qRT-DREB2A                                 | F          | 5'-GGGTAAATGGGTGCTGAGA-3'                 |
|                                            | R          | 5'-CGAGCCAAAGGACCATACAT-3'                |
| qRT-CBF3                                   | F          | 5'-ACAGAGGAGTTCGTCGGAGA-3'                |
|                                            | R          | 5'-CCATCTCAGCGTTTGAAAT-3'                 |
| qRT-CBF1                                   | F          | 5'-CTACGAATCCCGGAGTCAAC-3'                |
|                                            | R          | 5'-ATCGTCTCCTCCATGTCCAG-3'                |
| qRT-CBF2                                   | F          | 5'-AACAGAGCCAAGATGCGTTT-3'                |
|                                            | R          | 5'-ACGTCATCATCTCCCTCGAC-3'                |
| Identification for T-DNA insertion mutants |            |                                           |
| <i>fbn11-1</i>                             | LP         | 5'-TATTAAGGCACGTGTGGAAGG-3'               |
|                                            | RP         | 5'-GCAACGCTTACAGTACCATGG-3'               |
| <i>fbn11-2</i>                             | LP         | 5'-CGAATTTTCAAACCCTAAATCG-3'              |
|                                            | RP         | 5'-TTGTAAATTTCGGCAGATTTGG-3'              |
| LBb1.3                                     | genotyping | 5'-ATTTTGCCGATTTTCGGAAC-3'                |
| FBN11 RT                                   | F          | 5'-ATGGCACTTTGTGGTGTTC-3'                 |
|                                            | R          | 5'-CTACATAGACTTATGGTCCAAG-3'              |
| Generation of complementary plant          |            |                                           |
| pDONR-FBN11                                | F          | 5'-AAAAAGCAGGCTGTATGGCACTTTGTGGTGTTC-3'   |
|                                            | R          | 5'-AGAAAGCTGGGTGCATAGACTTATGGTCCAAGCTG-3' |
| qRT-FBN11                                  | F          | 5'-AGCCAAACTGTTGGTTGGAG-3'                |
|                                            | R          | 5'-ATTAAGGCACGTGTGGAAGG-3'                |
| GFP                                        | R          | 5'-TGAACCTGTGGCCGTTTACG-3'                |
|                                            | R(full)    | 5'-TACTTGTACAGCTCGTCC-3'                  |



**Table S2.** Amino acid composition and secondary structure of FBN11.

| Amino acid composition               |        |
|--------------------------------------|--------|
| Ala (A)                              | 5.1%   |
| Arg (R)                              | 7.8%   |
| Asn (N)                              | 4.5%   |
| Asp (D)                              | 4.8%   |
| Cys (C)                              | 1.5%   |
| Gln (Q)                              | 3.1%   |
| Glu (E)                              | 5.1%   |
| Gly (G)                              | 6.4%   |
| His (H)                              | 3.3%   |
| Ile (I)                              | 6.0%   |
| Leu (L)                              | 11.3%  |
| Lys (K)                              | 4.8%   |
| Met (M)                              | 3.1%   |
| Phe (F)                              | 4.2%   |
| Pro (P)                              | 4.5%   |
| Ser (S)                              | 9.9%   |
| Thr (T)                              | 4.9%   |
| Trp (W)                              | 1.8%   |
| Tyr (Y)                              | 1.9%   |
| Val (V)                              | 6.1%   |
| SOPMA secondary structure prediction |        |
| Alpha helix (Hh)                     | 32.09% |
| Extended strand (Ee)                 | 19.25% |
| Random coil (Cc)                     | 44.33% |

**Table S3.** FBN11 physical parameters.

|                                            |            |
|--------------------------------------------|------------|
| Number of amino acids                      | 670 aa     |
| Molecular weight                           | 75,766. Da |
| Theoretical pI                             | 9.43       |
| Instability index                          | 49.17      |
| Aliphatic index                            | 90.34      |
| Grand average of hydropathicity<br>(GRAVY) | -0.242     |
| Number of predicted TMHs                   | 0          |
| Number of AAs in TMHs                      | 0.03       |

**Table S4.** FBN11 orthologs analysis of plant evolution

| Green plants  | species                           | common name            | FBN11 ortholog (Locus)     | AA identity (%) |
|---------------|-----------------------------------|------------------------|----------------------------|-----------------|
| Dicots*       | <i>Arabidopsis thaliana</i>       | Thale Cress            | AT5G53450                  | 100             |
|               | <i>Brassica rapa</i>              | Mustard                | Bra003055                  | 88              |
|               | <i>Carica papaya</i>              | Papaya                 | evm.model.supercontig_3.70 | 69              |
|               | <i>Cucumis sativus</i>            | Cucumber               | Cucsa.040680.2             | 65              |
|               | <i>Glycine max</i>                | Soybean                | Glyma04g41510.1            | 70              |
|               |                                   |                        | Glyma06g13320.1            | 68              |
|               | <i>Lotus japonicus</i>            | Lotus                  | Lj1g0007393.1              | 70              |
|               | <i>Manihot esculenta</i>          | Cassava                | cassava4.1_003020m         | 68              |
|               | <i>Mimulus guttatus</i>           | Mimulus                | mgv11b005497m              | 64              |
|               | <i>Medicago truncatula</i>        | Barrel medic           | Medtr3g091290.1            | 68              |
|               | <i>Ricinus communis</i>           | Ricinus                | 30169.m006496              | 69              |
|               | <i>Prunus persica</i>             | Peach                  | ppa002468m                 | 67              |
|               | <i>Populus trichocarpa</i>        | Poplar                 | POPTR_0015s01910.1         | 69              |
|               |                                   |                        | POPTR_0492s00210.1         | 63              |
|               | <i>Solanum tuberosum</i>          | Potato                 | PGSC0003DMP400016058       | 64              |
|               |                                   |                        | PGSC0003DMP400016057       | 62              |
|               | <i>Vitis vinifera</i>             | Wine Grape             | GSVIVG01038710001          | 67              |
| Monocots*     | <i>Brachypodium distachyon</i>    | Brachypodium           | Bradi2g45450.1             | 59              |
|               | <i>Oryza sativa</i>               | Rice                   | LOC_Os01g46720.1           | 58              |
|               | <i>Sorghum bicolor</i>            | Sorghum                | Sb03g029870.1              | 59              |
|               | <i>Setaria italica</i>            | Foxtail millet         | Si000637m                  | 60              |
|               | <i>Zea mays</i>                   | Maize                  | GRMZM2G150952_T01          | 60              |
| Lycophytes*   | <i>Selaginella moellendorffii</i> | Spike Moss             | g105971                    | 48              |
| Bryophytes**  | <i>Physcomitrella patens</i>      | earthmoss              | Pp1s110_47V6.1             | 24              |
|               |                                   |                        | Pp1s159_111V6.1            | 23              |
|               | <i>Marchantia polymorpha</i>      | umbrella liverwort     | Mapoly0022s0163.1.p        | 47              |
| Charophytes** | <i>Chara braunii</i>              | charophyte green algae | CBR_g39728                 | 36              |
| Chlorophyta** | <i>Chlamydomonas reinhardtii</i>  | Chlamydomonas          | Cre02.g120250.t1.1 (STT7)  | 26              |

\* The protein sequence of Arabidopsis FBN11 was analyzed by BLAST in the Plant Genome Database, and the ortholog was found based on E-value  $1 \times 10^{-4}$ .

\*\*The genome database of lower plants was analyzed using Ensembl Plants.

**Table S5.** *FBN* gene family comparison between *Arabidopsis* and *Chlamydomonas reinhardtii*.

| <i>Arabidopsis thaliana</i> | <i>Chlamydomonas reinhardtii</i> |
|-----------------------------|----------------------------------|
| AtFBN1a                     | CrePLAP7, 8, 10                  |
| AtFBN1b                     |                                  |
| AtFBN2                      |                                  |
| AtFBN3a                     | CrePLAP2                         |
| AtFBN3b                     |                                  |
| AtFBN4                      | CrePLAP9                         |
| AtFBN5                      | CrePLAP6                         |
| AtFBN6                      | CrePLAP4                         |
| AtFBN7a                     | x                                |
| AtFBN7b                     |                                  |
| AtFBN8                      | CrePLAP1                         |
| AtFBN9                      | CrePLAP3                         |
| AtFBN10                     | CrePLAP5                         |
| AtFBN11                     | STT7                             |
